# Supplementary material for: A Comparative Analysis of Five AI Chatbots in Providing Patient Education on Smile Design
Source: Research Square preprint supplement (doi:10.21203/rs.3.rs-8210813/v1), 2025-12-01
Supplement: Supplementary file 1 [file 7daee342f667d930888e8d79.docx]

**Question:**

1. **Likert scale (accuracy)**

Score 1; the chatbot’s answer is completely incorrect

Score 2 the chatbot’s answer contains more incorrect items than correct items

Score 3; the chatbot’s answer contains an equal balance of correct and incorrect items

Score 4; the chatbot’s answer contains more correct items than incorrect items

Score 5; the chatbot’s answer is completely correct.

| Chatbot 1 | Chatbot 2 | Chatbot 3 | Chatbot 4 | Chatbot 5 |
| --- | --- | --- | --- | --- |
|  |  |  |  |  |

1. **Global Quality Score**

1. Low quality, video information flow weak, most information missing, not beneficial for patients

2. Usually, low quality and low flow of information, some listed information and many important

issues are missing, very limited use for patients

3. Moderate quality, the insufficient flow of information, and some important information is

sufficiently discussed, but some are poorly discussed and somewhat useful for patients

4. Good quality and generally good information flow. Most of the relevant information is listed,

but some topics are not covered, useful for patients

5. Excellent quality and information flow, very useful for patients

| Chatbot 1 | Chatbot 2 | Chatbot 3 | Chatbot 4 | Chatbot 5 |
| --- | --- | --- | --- | --- |
|  |  |  |  |  |

1. **PEMAT (UNDERSTANDABILITY)**

| **Item #** | **Item** | | | **Response Options** | **Rating** | | | | |
| --- | --- | --- | --- | --- | --- | --- | --- | --- | --- |
| Topic: **Content** | | | |  | Chatbot 1 | Chatbot 2 | Chatbot 3 | Chatbot 4 | Chatbot 5 |
| **1** | The material makes its purpose completely evident. | | | Disagree=0, Agree=1 |  |  |  |  |  |
| **2** | The material does not include information or content that distracts from its purpose. | | | Disagree=0, Agree=1 |  |  |  |  |  |
| Topic: **Word Choice & Style** | | | |  |  |  |  |  |  |
| **3** | The material uses common, everyday language. | | | Disagree=0, Agree=1 |  |  |  |  |  |
| **4** | Medical terms are used only to familiarize audience with the terms. When used, medical terms are defined. | | | Disagree=0, Agree=1 |  |  |  |  |  |
| **5** | The material uses the active voice. | | | Disagree=0, Agree=1 |  |  |  |  |  |
| Topic: **Use of Numbers** | | | |  |  |  |  |  |  |
| **6** | Numbers appearing in the material are clear and easy to understand. | | | Disagree=0, Agree=1, No numbers=N/A |  |  |  |  |  |
| **7** | The material does not expect the user to perform calculations. | | | Disagree=0, Agree=1 |  |  |  |  |  |
| Topic: **Organization** | | | |  |  |  |  |  |  |
| **8** | The material breaks or “chunks” information into short sections. | | | Disagree=0, Agree=1,  Very short material[[1]](#footnote-1)=N/A |  |  |  |  |  |
| **9** | The material’s sections have informative headers. | | | Disagree=0, Agree=1,  Very short material*=N/A |  |  |  |  |  |
| **10** | The material presents information in a logical sequence. | | | Disagree=0, Agree=1 |  |  |  |  |  |
| **11** | The material provides a summary. | | | Disagree=0, Agree=1,  Very short material*=N/A |  |  |  |  |  |
| Topic: **Layout & Design** | | | |  |  |  |  |  |  |
| **12** | The material uses visual cues (e.g., arrows, boxes, bullets, bold, larger font, highlighting) to draw attention to key points. | | | Disagree=0, Agree=1 Video=N/A |  |  |  |  |  |
| **15** | | The material uses visual aids whenever they could make content more easily understood (e.g., illustration of healthy portion size). | Disagree=0, Agree=1 | |  |  |  |  |  |
| **16** | | The material’s visual aids reinforce rather than distract from the content. | Disagree=0, Agree=1, No visual aids=N/A | |  |  |  |  |  |
| **17** | | The material’s visual aids have clear titles or captions. | Disagree=0, Agree=1, No visual aids=N/A | |  |  |  |  |  |
| **18** | | The material uses illustrations and photographs that are clear and uncluttered. | Disagree=0, Agree=1, No visual aids=N/A | |  |  |  |  |  |
| **19** | | The material uses simple tables with short and clear row and column headings. | Disagree=0, Agree=1, No tables=N/A | |  |  |  |  |  |
| Total Points | | | | |  |  |  |  |  |
| Possible total points | | | | |  |  |  |  |  |
| Understandability Score (%):  (Total Points / Total Possible Points) x 100 | | | | |  |  |  |  |  |

1. **PEMAT (ACTIONABILITY)**

| **Item #** | **Item** | **Response Options** | **Rating** | | | | |
| --- | --- | --- | --- | --- | --- | --- | --- |
|  |  |  | Chatbot 1 | Chatbot 2 | Chatbot 3 | Chatbot 4 | Chatbot 5 |
| **20** | The material clearly identifies at least one action the user can take. | Disagree=0, Agree=1 |  |  |  |  |  |
| **21** | The material addresses the user directly when describing actions. | Disagree=0, Agree=1 |  |  |  |  |  |
| **22** | The material breaks down any action into manageable, explicit steps. | Disagree=0, Agree=1 |  |  |  |  |  |
| **23** | The material provides a tangible tool (e.g., menu planners, checklists) whenever it could help the user take action. | Disagree=0, Agree=1 |  |  |  |  |  |
| **24** | The material provides simple instructions or examples of how to perform calculations. | Disagree=0, Agree=1, No calculations=NA |  |  |  |  |  |
| **25** | The material explains how to use the charts, graphs, tables, or diagrams to take actions. | Disagree=0, Agree=1, No charts, graphs, tables, or  diagrams=N/A |  |  |  |  |  |
| **26** | The material uses visual aids whenever they could make it easier to act on the instructions. | Disagree=0, Agree=1 |  |  |  |  |  |
| Total Points | | |  |  |  |  |  |
| Possible total points | | |  |  |  |  |  |
| Actionability Score (%):  (Total Points / Total Possible Points) x 100 | | |  |  |  |  |  |

1. 3 [↑](#footnote-ref-1)
